# Supplementary material for: SmartFilm Tablets for Improved Oral Delivery of Poorly Soluble Drugs
Source: MDPI journal article supplement (doi:10.3390/pharmaceutics14091918), 2022-09-10
Supplement: s1 [file s1]

## Article

# smartFilm tablets for improved oral delivery of poorly soluble drugs

Ayat Abdelkader <sup>1,2</sup>, Eduard Preis <sup>1</sup> and Cornelia M. Keck <sup>1,\*</sup>

<sup>1</sup> Department of Pharmaceutics and Biopharmaceutics, Philipps-Universität Marburg, Robert-Koch-Str. 4, 35037 Marburg, Germany

<sup>2</sup> Assiut International Center of Nanomedicine, Al-Rajhi Liver Hospital, Assiut University, 71515 Assiut, Egypt

\* Correspondence: cornelia.keck@pharmazie.uni-marburg.de; Tel.: 49 6421 282 5881

## Supplementary Materials:

**Table S1.** Macro used for the determination of the Feret's diameter, with a scale set to 20 px/mm.

```
run("8-bit");
setAutoThreshold("Default");
//run("Threshold...");
//setThreshold(0, 180);
setOption("BlackBackground", false);
run("Convert to Mask");
run("Analyze Particles...", "size=0.09-Infinity show=Masks display");
```

**Table S2.** Macro used for the automated threshold to subtract the autofluorescence of the intestinal tissue from the fluorescence of the permeated curcumin.

```
// Color Thresholder 1.53k
// Autogenerated macro, single images only!
min=newArray(3);
max=newArray(3);
filter=newArray(3);
a=getTitle();
run("RGB Stack");
run("Convert Stack to Images");
selectWindow("Red");
rename("0");
selectWindow("Green");
rename("1");
selectWindow("Blue");
rename("2");
min[0]=0;
max[0]=0;
filter[0]="stop";
```

```
min[1]=75;
max[1]=255;
filter[1]="pass";
min[2]=0;
max[2]=0;
filter[2]="stop";
for (i=0;i<3;i++){
    selectWindow(""+i);
    setThreshold(min[i], max[i]);
    run("Convert to Mask");
    if (filter[i]=="stop") run("Invert");
}
imageCalculator("AND create", "0", "1");
imageCalculator("AND create", "Result of 0", "2");
for (i=0;i<3;i++){
    selectWindow(""+i);
    close();
}
selectWindow("Result of 0");
close();
selectWindow("Result of Result of 0");
rename(a);
// Colour Thresholding-----
run("Invert");
```

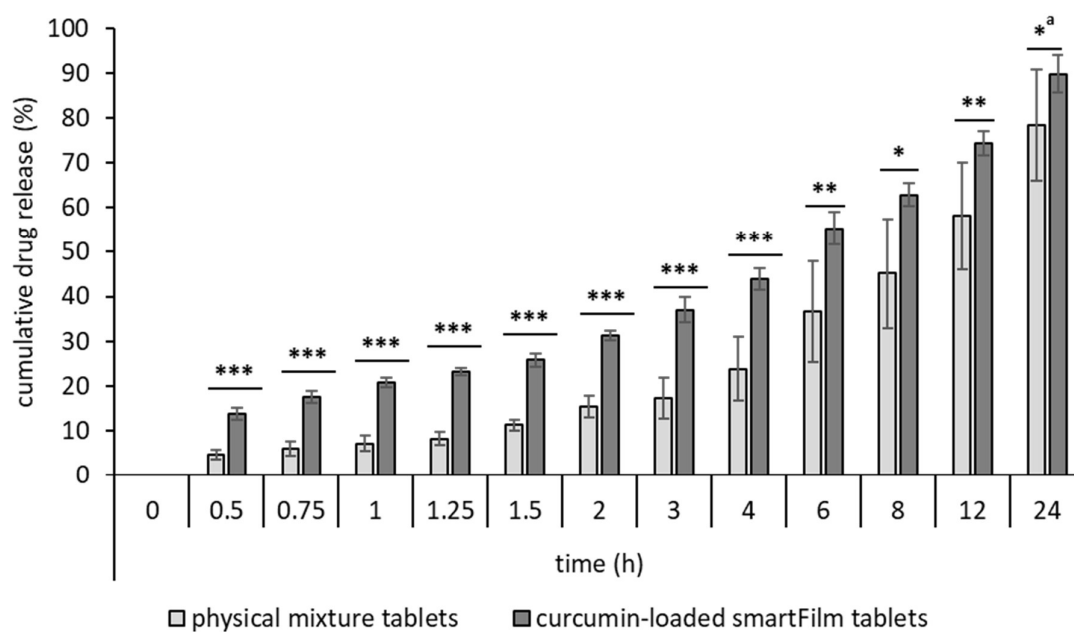

<sup>a</sup> one-tailed t-test

**Figure S1.** The dissolution profiles of curcumin from physical mixture tablets and curcumin-loaded smartFilm tablets. \*  $p < 0.05$ , \*\*  $p < 0.01$ , \*\*\*  $p < 0.001$ .
